# Supplementary material for: Multilocus Sequence Analysis for Leishmania braziliensis Outbreak Investigation
Source: PLoS Negl Trop Dis. 2014 Feb 13;8(2):e2695. doi: 10.1371/journal.pntd.0002695 (PMC3923721; doi:10.1371/journal.pntd.0002695)
Supplement: Supporting Information S1 — Summary of clonal complex and genetic cluster of strains by state. (XLS) [file pntd.0002695.s001.xls]

## Sheet: Sheet1
Region	State		Clonal complex				Genetic Cluster
		Total	CC1	CC2	CC3	Unique sequence	POP1	POP2	POP3
Amazon		17	0	0	1	16	15	1	1
	Acre (AC)	2	0	0	0	2	2	0	0
	Amazonas (AM)	3	0	0	0	3	3	0	0
	Pará (PA)	6	0	0	1	5	5	0	1
	Mato Grosso (MT)	3	0	0	0	3	2	1	0
	Rondônia (RO)	3	0	0	0	3	3	0	0
Northeast		29	6	2	1	20	12	5	12
	Bahia (BA)	16	3	2	0	11	7	1	8
	Ceará (CE)	1	0	0	0	1	1	0	0
	Paraíba (PB)	1	0	0	0	1	1	0	0
	Pernambuco (PE)	11	3	0	1	7	3	4	4
Southeast/South		39	28	0	0	11	9	29	1
	Rio de Janeiro (RJ)	5	0	0	0	5	4	0	1
	Espírito Santo (ES)	1	0	0	0	1	1	0	0
	Santa Catarina (SC)	33	28	0	0	5	4	29	0
	Total	85	34	2	2	47	36	35	14
